# Supplementary material
Source: Springer Nature journal article supplement (https://www.springermedizin.de/resource/supplementary/12967_2008_291_MOESM6_ESM.pdf/9576124)

(A) TIL1520 response to gp100<sub>209</sub>

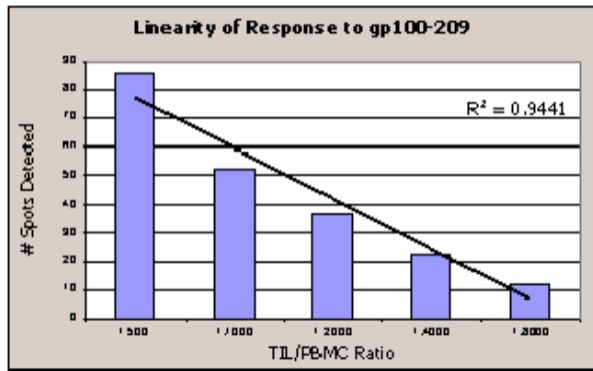

(B) TIL1235 response to MART-1

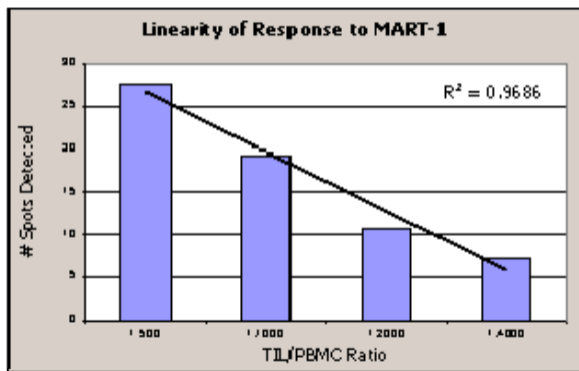

Supplement: MOESM6 [file 9576124]
